# Supplementary material for: Association of IgG Glycosylation and Esophageal Precancerosis Beyond Inflammation
Source: Oxford University Press journal article supplement (doi:10.1158/1940-6207.capr-20-0489), 2020-12-10
Supplement: 19406207capr200489-sup-251970_2_supp_6747609_qkbx80.docx [file 19406207capr200489-sup-251970_2_supp_6747609_qkbx80.docx]

**Supplementary Figure Legend**

**Supplementary Figure S1**

UPLC analysis and the structures of the detected IgG glycans.

**Supplementary Figure S2**

The nonlinear relationship of IgG glycosylation and esophageal precancerosis in the

multivariate model.
